# Supplementary material for: Zeb2 Regulates Myogenic Differentiation in Pluripotent Stem Cells
Source: Int J Mol Sci. 2020 Apr 5;21(7):2525. doi: 10.3390/ijms21072525 (PMC7177401; doi:10.3390/ijms21072525)

# Zeb2 Regulates Myogenic Differentiation in Pluripotent Stem Cells

Ester Sara Di Filippo<sup>1,2</sup>, Domiziana Costamagna<sup>2</sup>, Giorgia Giacomazzi<sup>2</sup>, Álvaro Cortés-Calabuig<sup>3</sup>, Agata Stryjewska<sup>2,†</sup>, Danny Huylebroeck<sup>2,4</sup>, Stefania Fulle<sup>1</sup> and Maurilio Sampaolesi<sup>2,5,\*</sup>

<sup>1</sup> Dept. of Neuroscience Imaging and Clinical Sciences, University “G. d'Annunzio” of Chieti-Pescara, 66100 Chieti, Italy;

<sup>2</sup> Dept. of Development and Regeneration, KU Leuven, 3000 Leuven, Belgium;

<sup>3</sup> Laboratory for Cytogenetics and Genome Research, KU Leuven, 3000 Leuven, Belgium;

<sup>4</sup> Department of Cell Biology, Erasmus University Medical Center, 3015 CN Rotterdam, The Netherlands;

<sup>5</sup> Human Anatomy Unit, Department of Public Health, Experimental and Forensic Medicine, University of Pavia, 27100, Pavia, Italy;

<sup>†</sup> *Present address:* Neural Development, Plasticity and Repair, Wolfson Institute for Biomedical Research, University College London, London WC1E 6BT, U.K.

\* Correspondence: [maurilio.sampaolesi@kuleuven.be](mailto:maurilio.sampaolesi@kuleuven.be)

## SUPPLEMENTAL INFORMATION

### Supplementary Materials and Methods

#### **NADH – transferase staining.**

Muscle sections (7 µm) were rehydrated into PBS and incubated for 20 minutes at 37 °C with 0,4 mg/ml of NADH, 0,8 mg/ml of NBT in 0,1M Tris HCl. Washed twice in water, dehydrated in 75% of Ethanol for 1 minute, 95% of Ethanol for 1 minute 100% of Ethanol for 5 minutes. Remove the Ethanol with Xylene for 5 minutes. The day after, the sections were mounted with glycerol and then photographed. To quantify both the glycolytic fibers and the oxidative fibers in each coverslip/sample was calculated using the ImageJ software.

**Plasmids and transfection assays in C2C12 myoblast cell lines.** Transfection experiments with Zeb2 and *ZnfZeb2* mutant plasmids were carried out using Lipofectamine 2000 (Invitrogen). The day before the transfection, the C2C12 cells were seeded according to the manufacturer's protocol. The DNA-Lipofectamine complexes were incubated for 20 minutes at room temperature, added directly to the cell lines and after 9 h the growth medium was added. The following day, the growth medium was removed and was replaced with the differentiation medium.

Figure S1

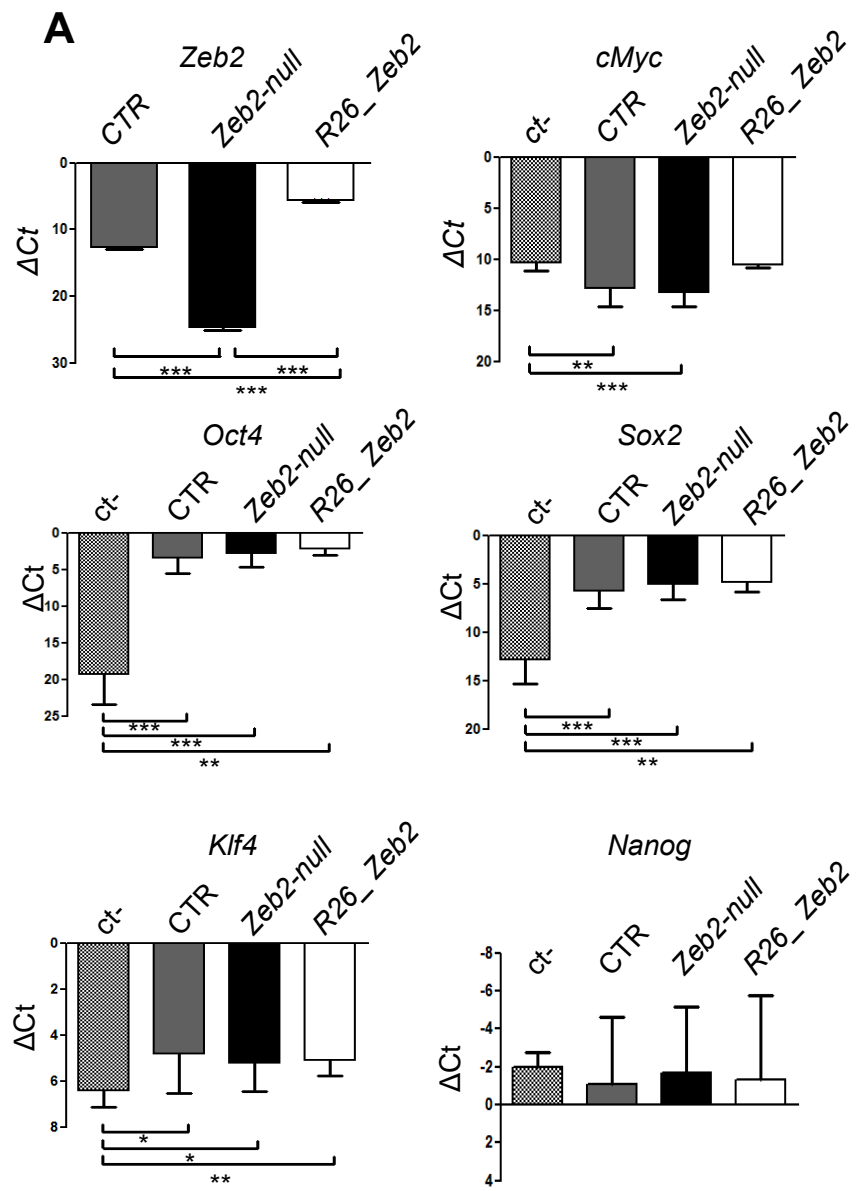

Figure S1. Pluripotent gene expression in *Zeb2*-null and *R26\_Zeb2* mESCs.

(A) qRT-PCR analysis for the expression of *Zeb2*, *cMyc*, *Oct4*, *Sox2*, *Klf4* and *Nanog* in wt (CTR), *Zeb2*-null and *R26\_Zeb2* mESCs and in MEF (ct-). Values are shown as mean  $\pm$  SD, n= 3, \*p<0.05, \*\*p<0.005, \*\*\*p<0.0001.

**Figure S2**

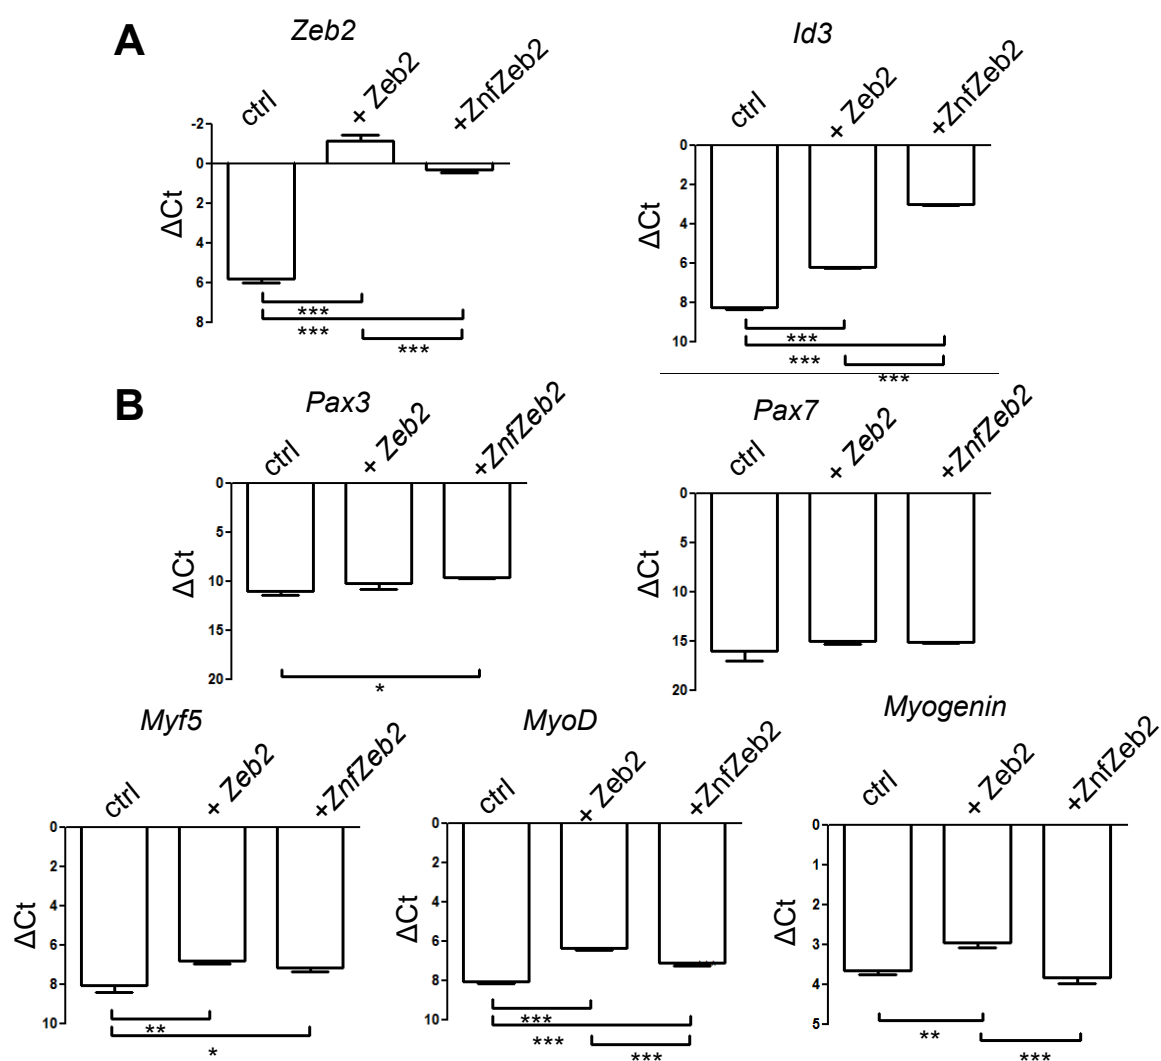

**Figure S2**

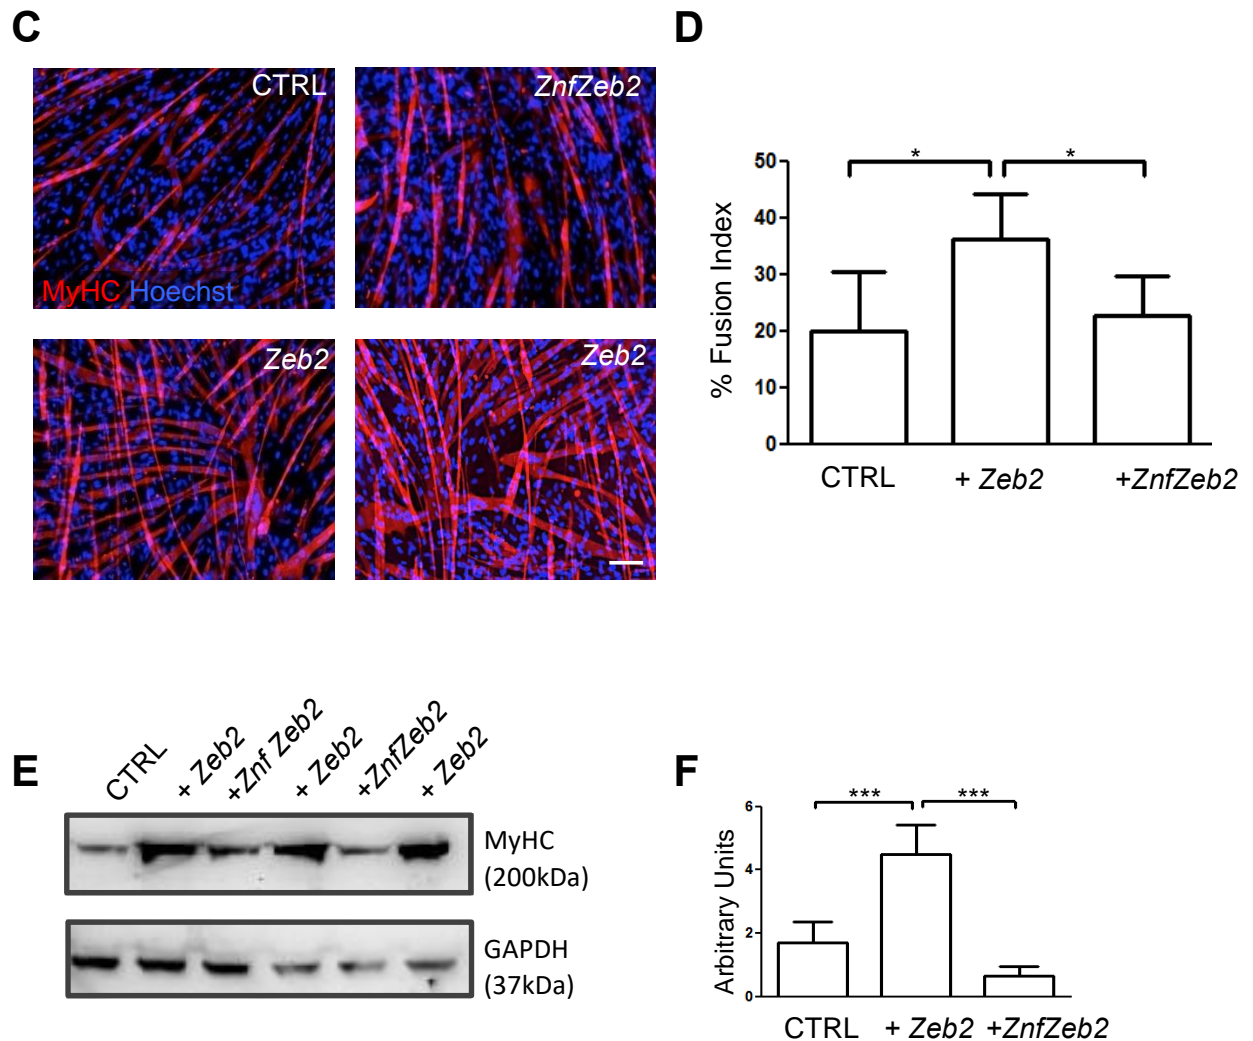

**Figure S2. Zeb2 overexpression in C2C12 cells.**

(A) C2C12 were transfected with Zeb2 (+ Zeb2) or with *ZnfZeb2* mutant (+*ZnfZeb2*). At day 7 from serum starvation when C2C12 were fully differentiated, qRT-PCR analysis for the Zeb2 and Id3 mRNA levels was performed. (B) qRT-PCR analysis for Pax3, Pax7, Myf5, MyoD and Myogenin at day 7 from myogenic induction in C2C12 transfected with Zeb2 (+Zeb2) or *ZnfZeb2* mutant (+*ZnfZeb2*) plasmids. Gapdh was used as a housekeeping gene for normalization. Values are shown as mean  $\pm$  SD; n = 3, \*p<0.05, \*\*p<0.005, \*\*\*p<0.0001. (C) Immunofluorescence analysis of MyHC (in red) at day 7 from myogenic induction in C2C12 transfected with Zeb2 (+Zeb2) or *ZnfZeb2* mutant (+*ZnfZeb2*) plasmids. Nuclei were stained in blue with Hoechst. Scale bars = 50  $\mu$ m. (D) The percentage of fusion index in C2C12

transfected with Zeb2 (+Zeb2) or *ZnfZeb2* mutant (+*ZnfZeb2*) plasmids are expressed as mean  $\pm$  SD; n = 5 (10 randomly selected fields were examined per sample); \*p<0.05. (E) Example of WB analysis for MyHC and GAPDH in samples showed in C. (F) Quantification of WB analysis shown in E. Values are shown as mean  $\pm$  SD; n = 3, \*\*\*p<0.0001

Figure S3

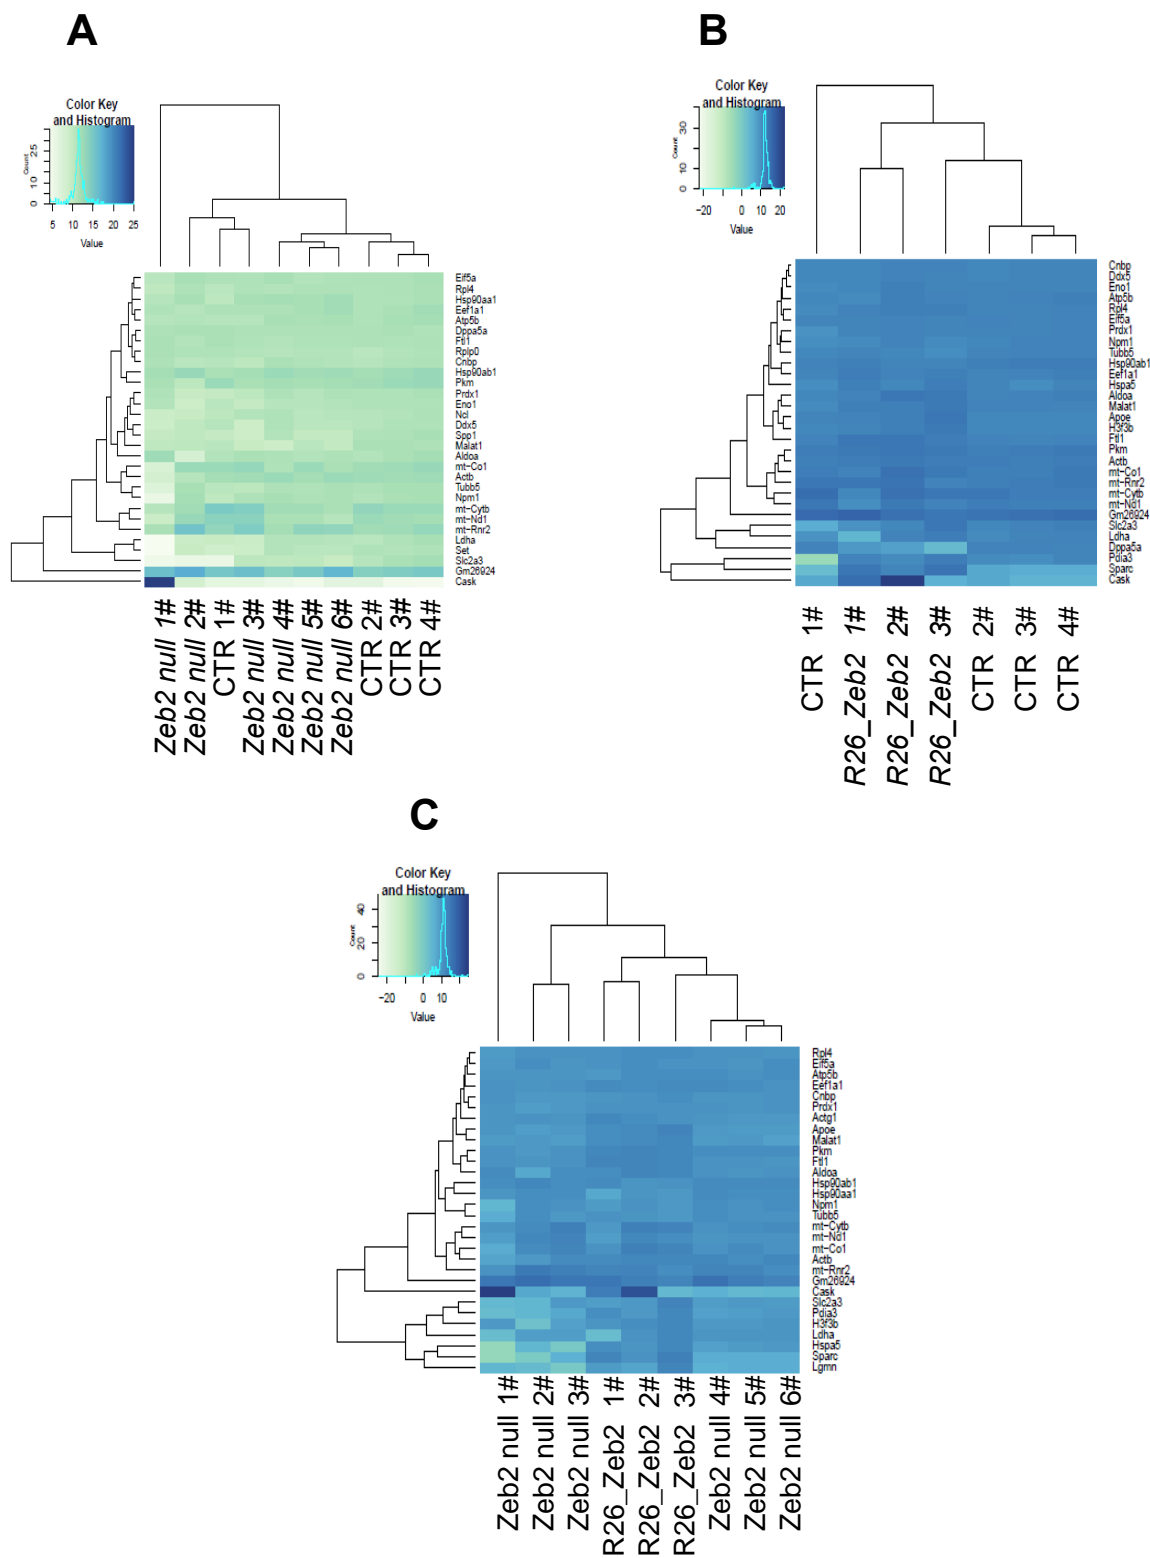

**Figure S3. A heatmap of the top 30 highly expressed genes in wt (CTR), *Zeb2-null* and *R26\_Zeb2* mCherry/MyoD-positive cells.**

(A) Comparison between CTRL (n=4) and *Zeb2-null* (n=6) single cells. (B) Comparison between CTRL (n=4) and *R26\_Zeb2*, (n=3) single cells. (C) Comparison between *Zeb2-null* (n=6) and *R26\_Zeb2* (n = 3) single cells.

**Figure S4**

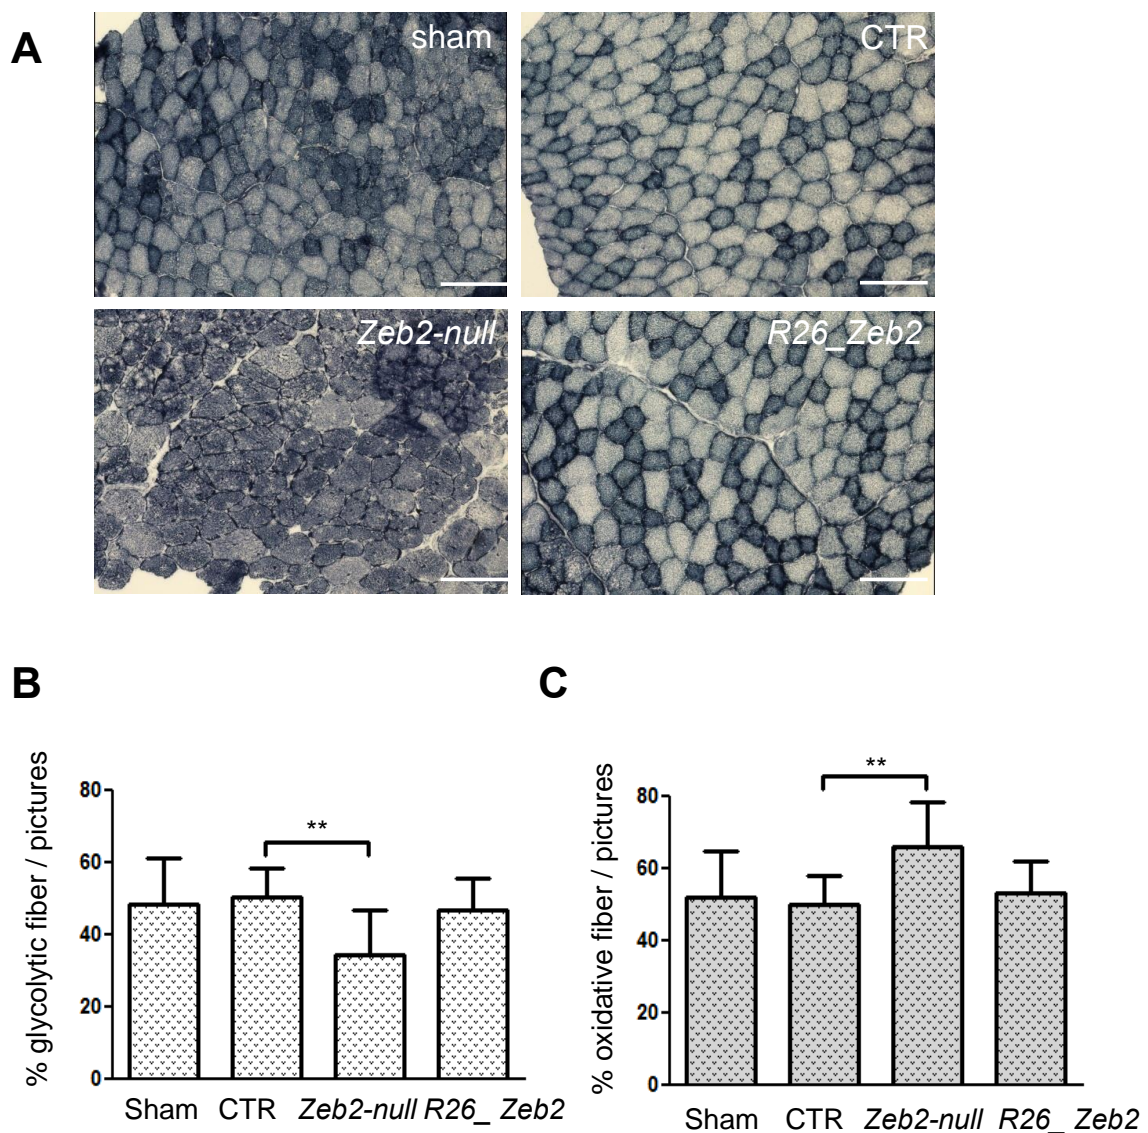

**Figure S4. Oxidative and glycolytic muscle fibers in acute injured muscles transplanted with GFP+ wt, *Zeb2-null* and *R26\_Zeb2* mESC derivatives.**

(A) NADH – transferase staining in cross sections of *tibialis anterior* muscles from sham mice or treated with GFP+ CTR (*Zeb2<sup>flox/flox</sup>*), GFP+ *Zeb2-null*, or GFP+

*R26\_Zeb2* mESC derivatives. (B, C) Quantification of oxidative and glycolytic fiber types from *tibialis anterior* muscles of treated mice. Data are expressed in percentages as mean  $\pm$  SD, n = 5 independent experiments (10 randomly selected fields per sample were examined). \*\* p<0,005.

**Figure S5**

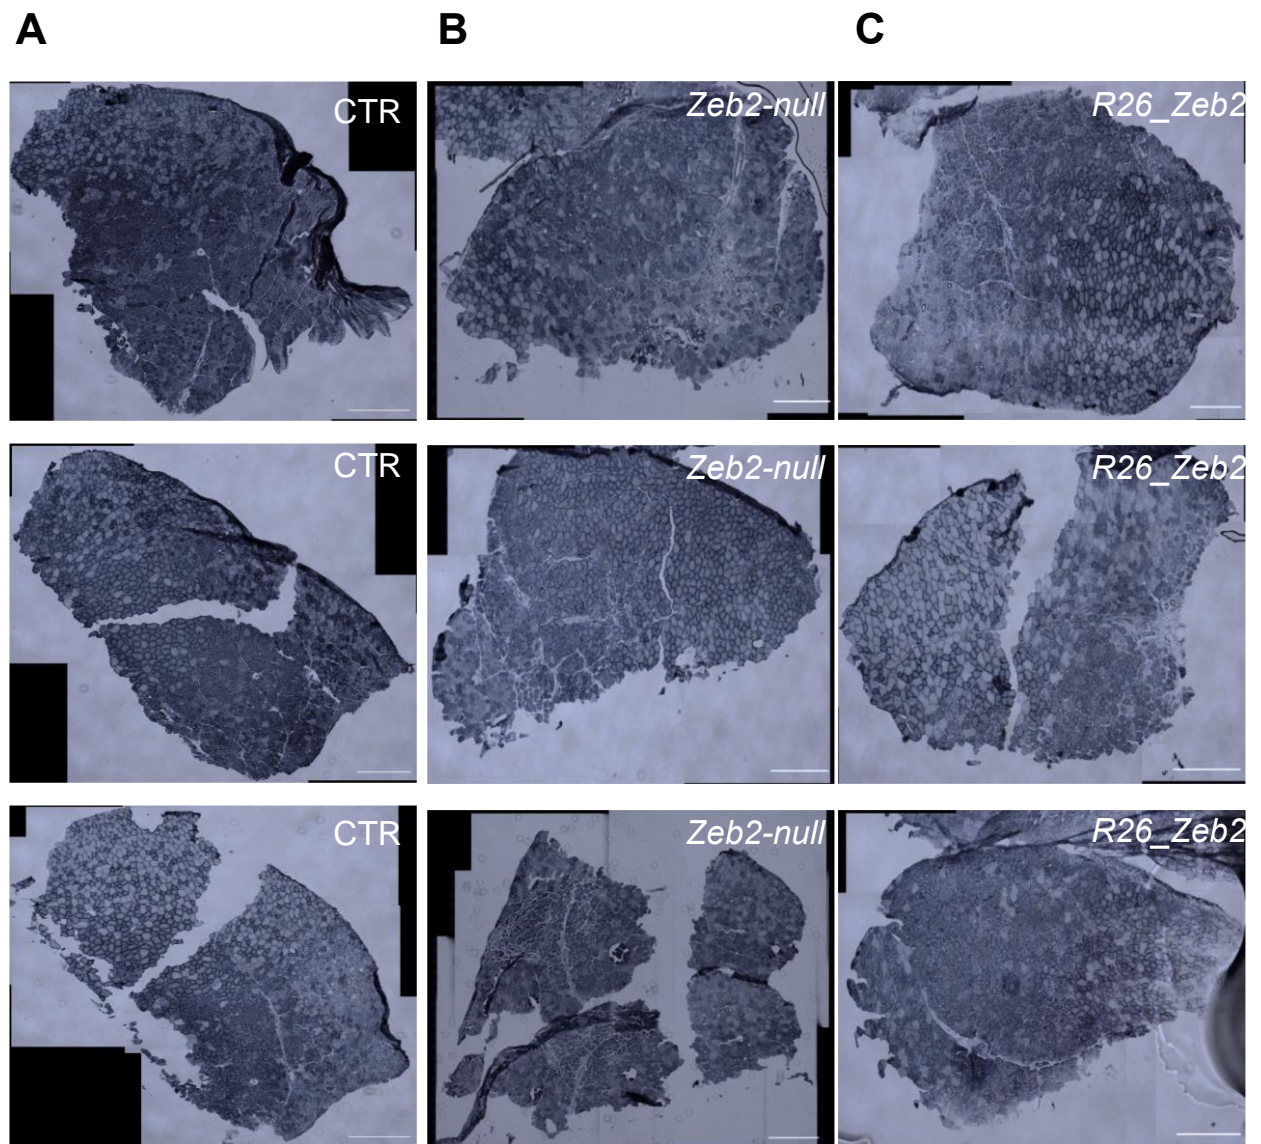

**Figure S5. Examples of whole muscle section reconstructions upon NADH – transferase staining of treated muscles.** NADH transferase staining of *tibialis anterior* cross-sections from muscles treated with GFP+ CTR (*Zeb2<sup>flox/flox</sup>*), GFP+ Zeb2-null, or GFP+ *R26\_Zeb2* mESC derivatives. Scale bars = 200  $\mu$ m.

**Uncropped western blot filters used in the figures**

**WB filter used in Figure 2C**

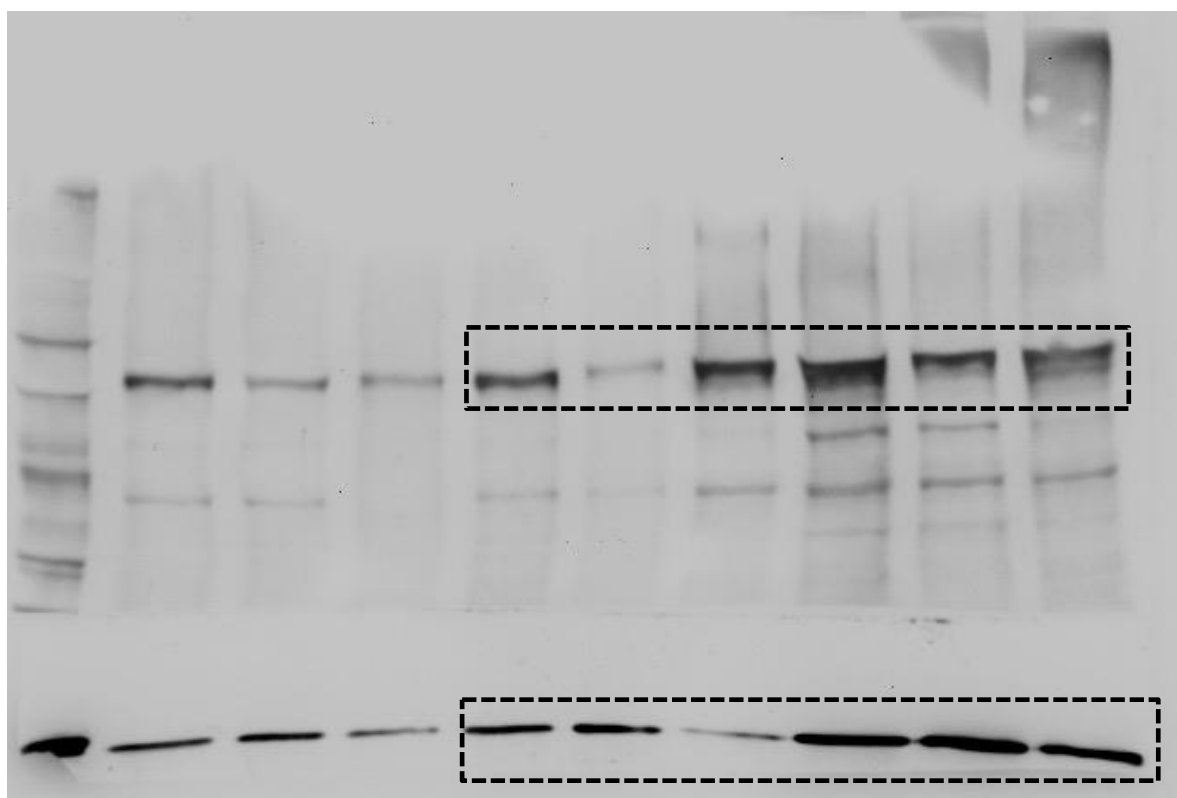

**WB filters used in Figure S2E**

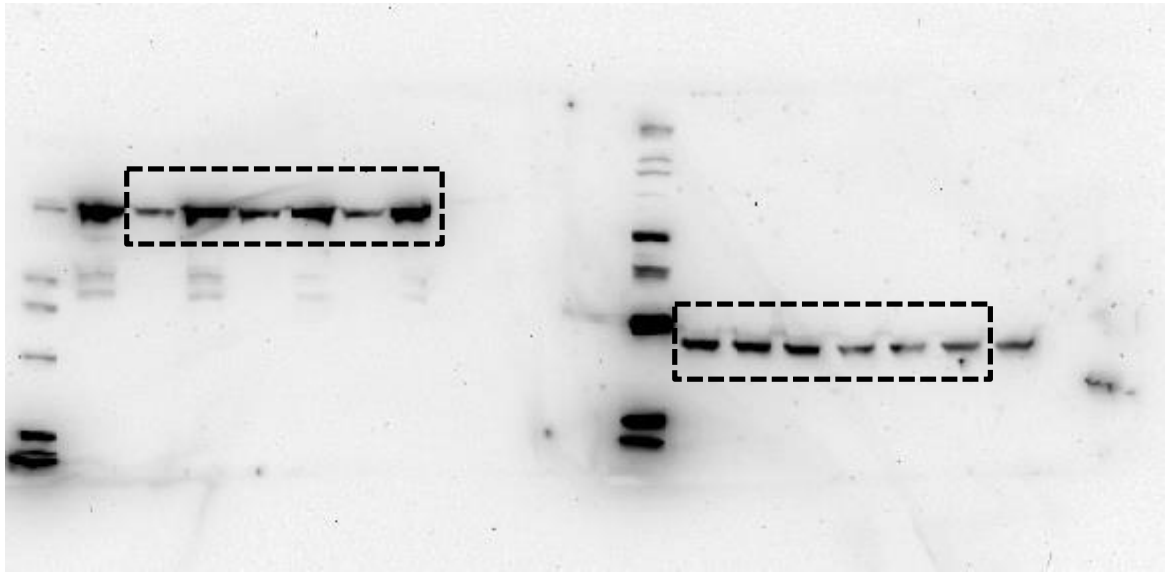

Supplement: Supplementary file 1 [file ijms-21-02525-s001.pdf]
